# Supplementary material for: Long noncoding RNA PANDA and scaffold-attachment-factor SAFA control senescence entry and exit
Source: PubMed Central journal article supplement (PMC4263151; doi:10.1038/ncomms6323), 2014-11-19
Supplement: ncomms6323-s1.pdf [file ncomms6323-s1.pdf]

## Supplementary Figure 1

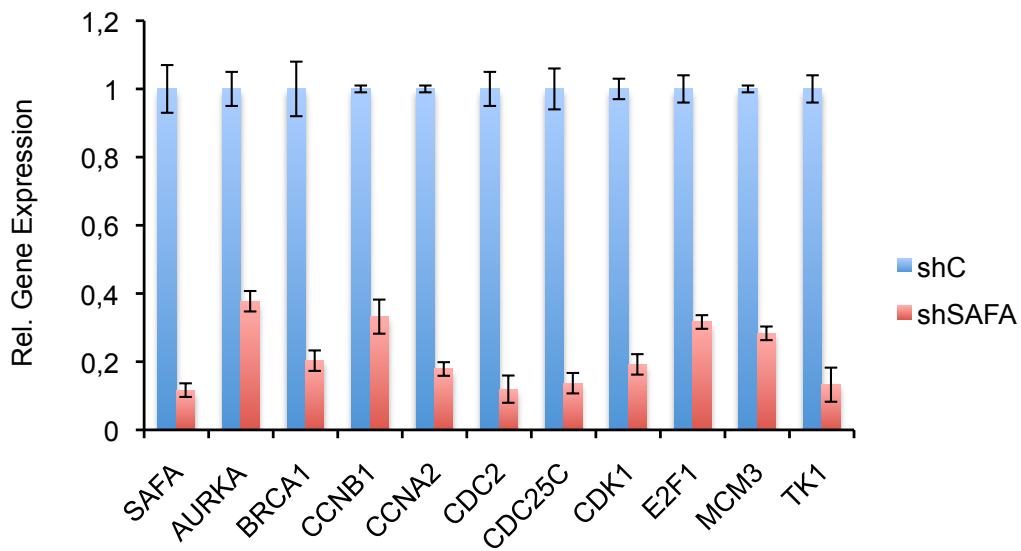

**Supplementary Figure 1. SAFA repression actively contributes to senescence entry.** Presenescent proliferating BJ fibroblasts were transduced either with pLKO.1-shC or pLKO.1-shSAFA-1. qRT-PCR on total RNA prepared from respective samples at day 6 post drug selection for indicated E2F-regulated pro-proliferation target genes. Error bars represent the s.d. of three independent experiments;  $P \leq 0,05$ , *t*-test.

## Supplementary Figure 2

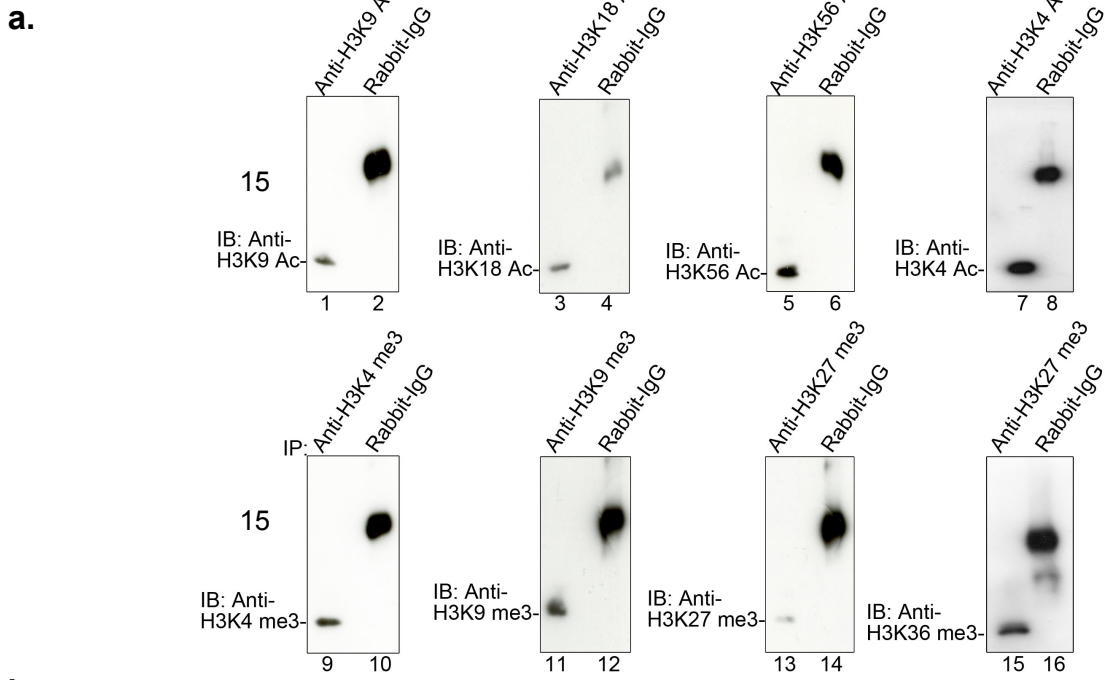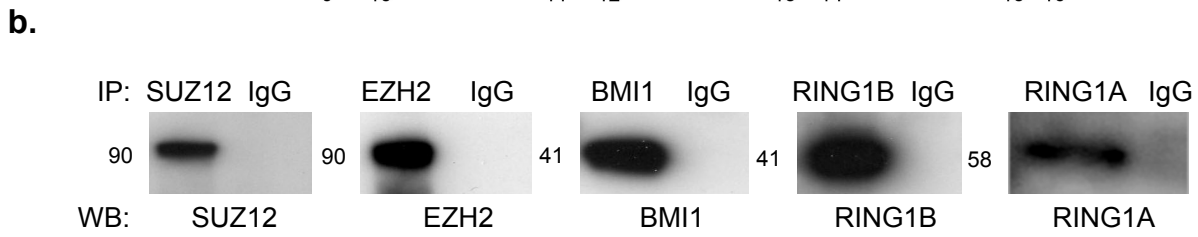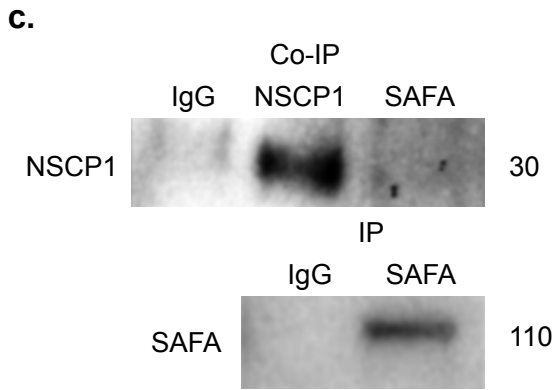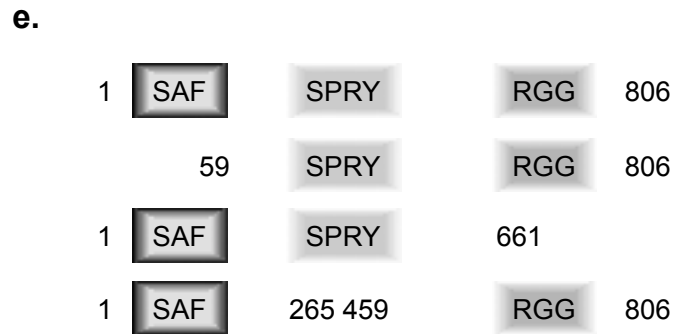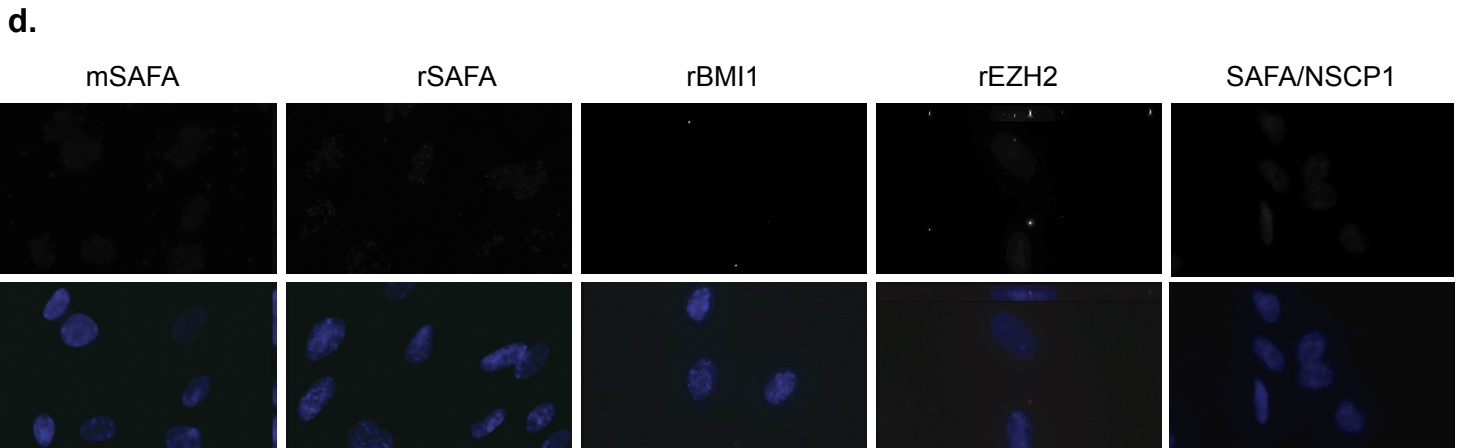

**Supplementary Figure 2. SAFA repression actively contributes to senescence entry.** **a.** Efficacy of antibodies against histone modifications used in histone-association-assay of Figure 2A. **b.** Efficacy of antibodies to SUZ12, EZH2, BMI1, RING1A and RING1B antibodies used in co-immunoprecipitation experiments of Figure 2C. **c.** Representative (n = 3) co-immunoprecipitation (Co-IP) of endogenous SAFA with PcG protein NSCP1 in proliferating BJ fibroblasts using antibodies to NSCP1 and SAFA or IgG. Immunoprecipitates were Western-blotted with antibodies to NSCP1 and SAFA. **d.** Specificity of proximity-ligation assay (PLA) was tested by omitting one primary antibody out of the two used in Figure 2D. Shown are negative technical controls for mouse (m) anti-SAFA- and rabbit (r) anti-SAFA-, BMI1- and EZH2-specific antibodies. Also shown is a SAFA-NCSP1 negative biological control. DAPI was used to counterstain nuclear DNA. Scale bar 20  $\mu\text{m}$ . **e.** Schematic drawing of FLAG-tagged SAFA mutants used in Figures 2E and -5C.

### Supplementary Figure 3

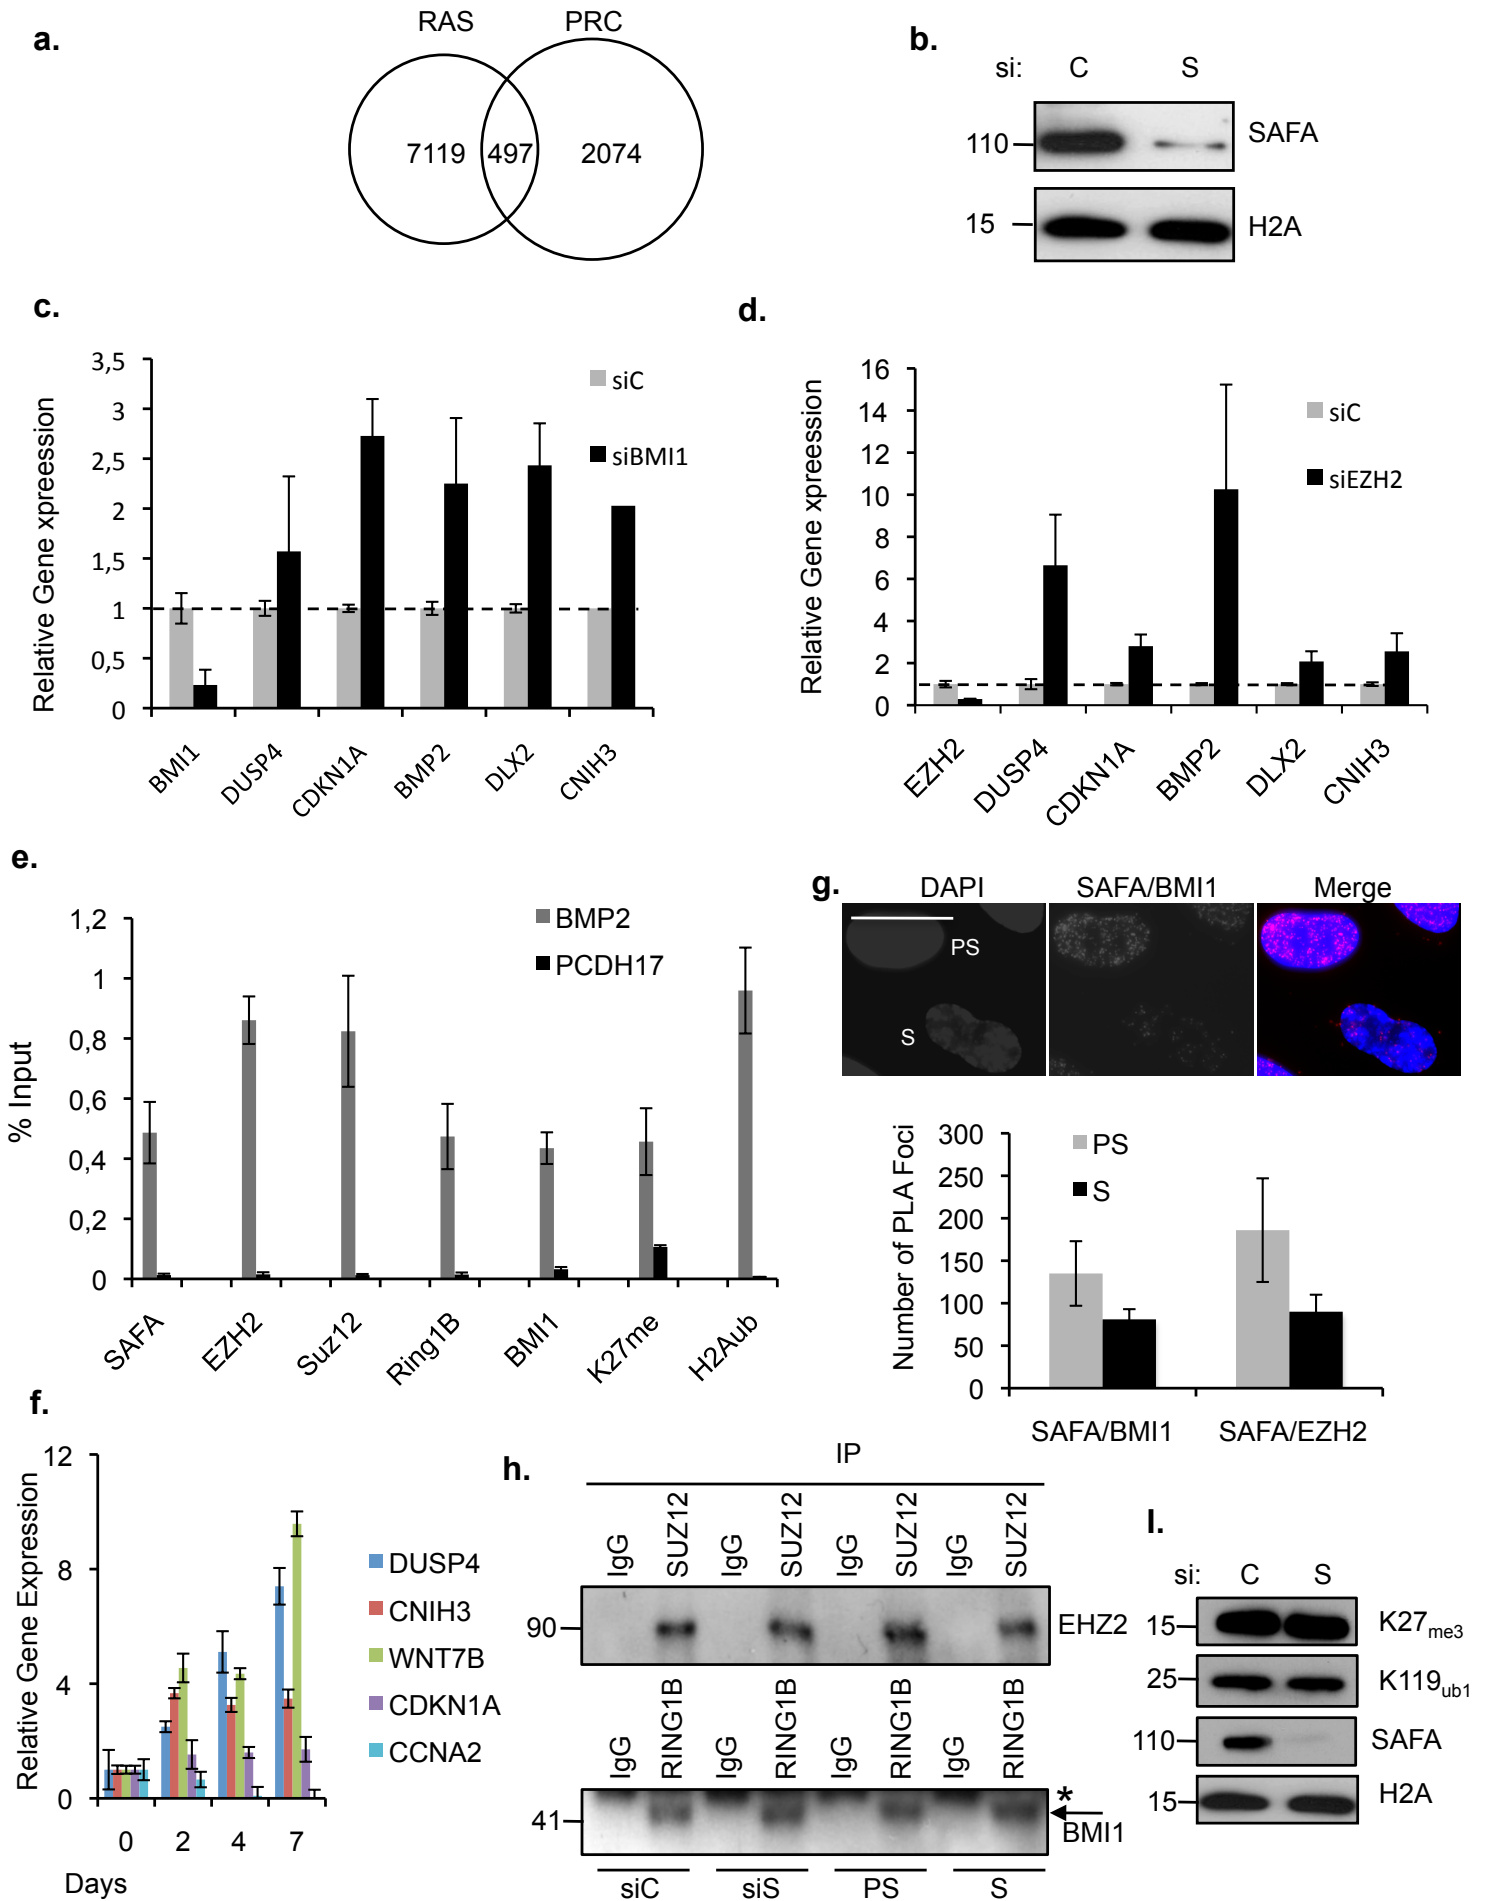

**Supplementary Figure 3. SAFA regulates expression of pro-senescence genes. a.**

Venn diagram depicting number of potential PRC targets derepressed by at least 2-fold in RAS senescence. **b.** Silencing efficiency of siRNA pool against SAFA used in this study as determined by western Blot. **c-d.** Presenescent proliferating BJ fibroblasts were transiently transfected with siScramble control (siC), **c.** siBMI1 or **d.** siEZH2. qRT-PCR on total RNA prepared from respective samples at day 2 of siRNA treatment for indicated genes. Error bars represent the s.d. of three independent experiments;  $P \leq 0,05$ , *t*-test. **e.** SAFA, EZH2, SUZ12, RING1B, BMI1, H3K27<sub>me3</sub> (K27<sub>me</sub>) and H2A<sub>Ub1</sub> (H2AK119<sub>Ub1</sub>) qChIP-PCR for BMP2 (positive control) and PCDH17 (negative control) was performed in proliferating BJ fibroblasts. **f.** Relative gene expression of indicated genes as measured by qRT-PCR at the indicated time-points on total RNA prepared from EtOH- and 4OHT-treated ER:Ras<sup>V12</sup> BJ fibroblasts. Note the gradual increase of SAFA-PRC-regulated genes and decrease of proliferation-promoting genes (e.g. CCNA2) starting as soon as day 2 post-tamoxifen treatment. **g.** Representative proximity-ligation assay (PLA) for SAFA and PcG proteins BMI1 and EZH2 in proliferating and RAS senescent (S) BJ fibroblasts. For clarity PS and S cells were mixed equally. Note the characteristic SAHF formation in RAS cells. Each dot represents a positive protein-protein interaction in PLA. Also shown is the quantification of PLA interactions. DAPI was used to counterstain nuclear DNA in merged images. Scale bar 20  $\mu$ M. Error bars represent the s.d. of three independent experiments;  $P \leq 0,05$  ( $n = 100$  cells/count), *t*-test. **h.** Endogenous co-immunoprecipitation (IP) of PcG proteins SUZ12 with EZH2 and RING1B with BMI1 in siScramble control (siC) or siSAFA (siS)-treated presenescent proliferating BJ fibroblasts or presenescent proliferating (PS) and RAS senescent (S) BJ fibroblasts. Immunoprecipitates were western-blotted either with EZH2 (upper panel) or BMI1 (lower panel). Asterix indicates IgG light chain and arrow BMI1. **i.** Presenescent proliferating BJ fibroblasts were treated with siScramble control (siC) or siSAFA (siS) for 3 days and whole cell lysates were analyzed by western blot using antibodies to H3K27<sub>me3</sub>, -H2AK119<sub>Ub1</sub>, -SAFA and -H2A.

## Supplementary Figure 4

A.

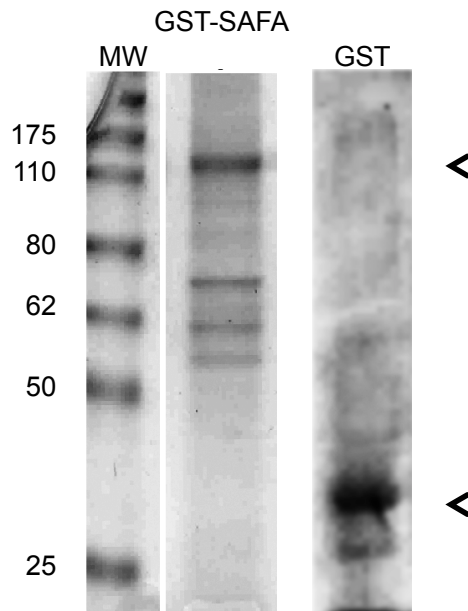

**Supplementary Figure 4. SAFA and PRCs are negative co-regulators of pro-senescence factor *CDKN1A* and lncRNA-PANDA.** Purification of recombinant GST-SAFA and GST from *E. coli* used in electrophoretic mobility shift assay of Figure 4C. Arrows indicate respective purified proteins that were used for EMSA in Figure 4C.

## Supplementary Figure 5

**a.**

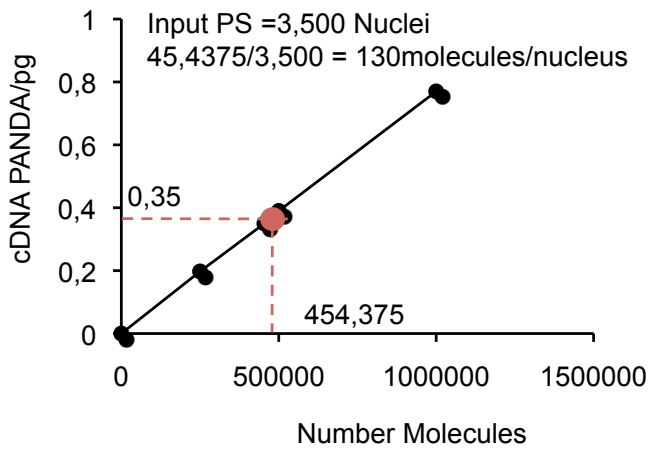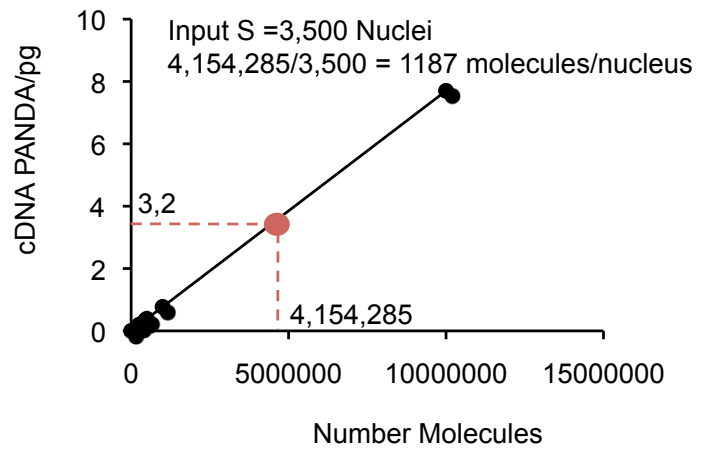

**b.**

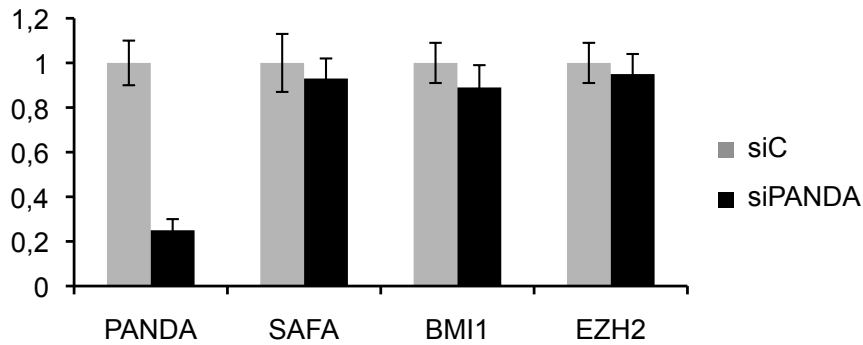

**c.**

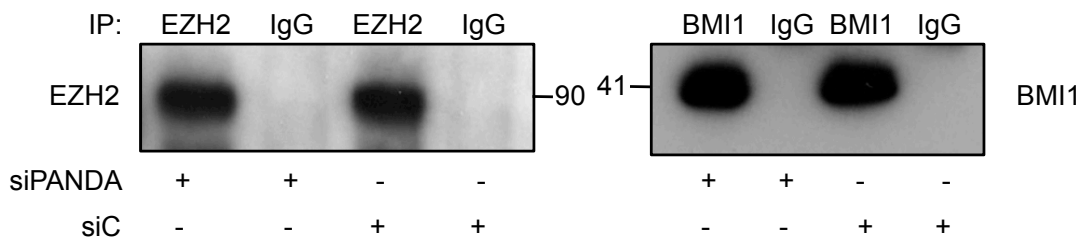

**d.**

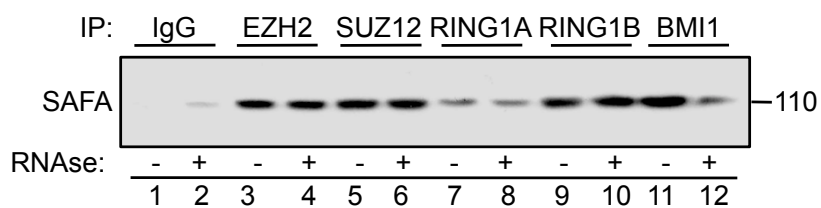

**Supplementary Figure 5. PANDA binds to SAFA and BMI1 and is critical for their interaction.** **a.** Titration curve used to determine number of PANDA molecules per nucleus. Red dotted lines signify PANDA molecules in presenescent proliferating (PS)(left graph) and RAS senescent (S)(right graph) cells. **b.** Presenescent proliferating BJ fibroblasts were treated with siScramble control (siC) or siPANDA for 3 days. qRT-PCR on total RNA prepared from respective samples for indicated genes. Error bars represent the s.d. of three independent experiments;  $P \leq 0,05$ , *t*-test. **c.** Efficacy of antibodies to EZH2 and BMI1 for native qRIP experiment of Figure 5E. **d.** Representative (n = 3) endogenous co-immunoprecipitation was performed in whole cell lysates treated with (+) or without (-) RNase A between SAFA and PcG proteins EZH2, SUZ12, RING1A, RING1B and BMI1.



## Supplementary Figure 6

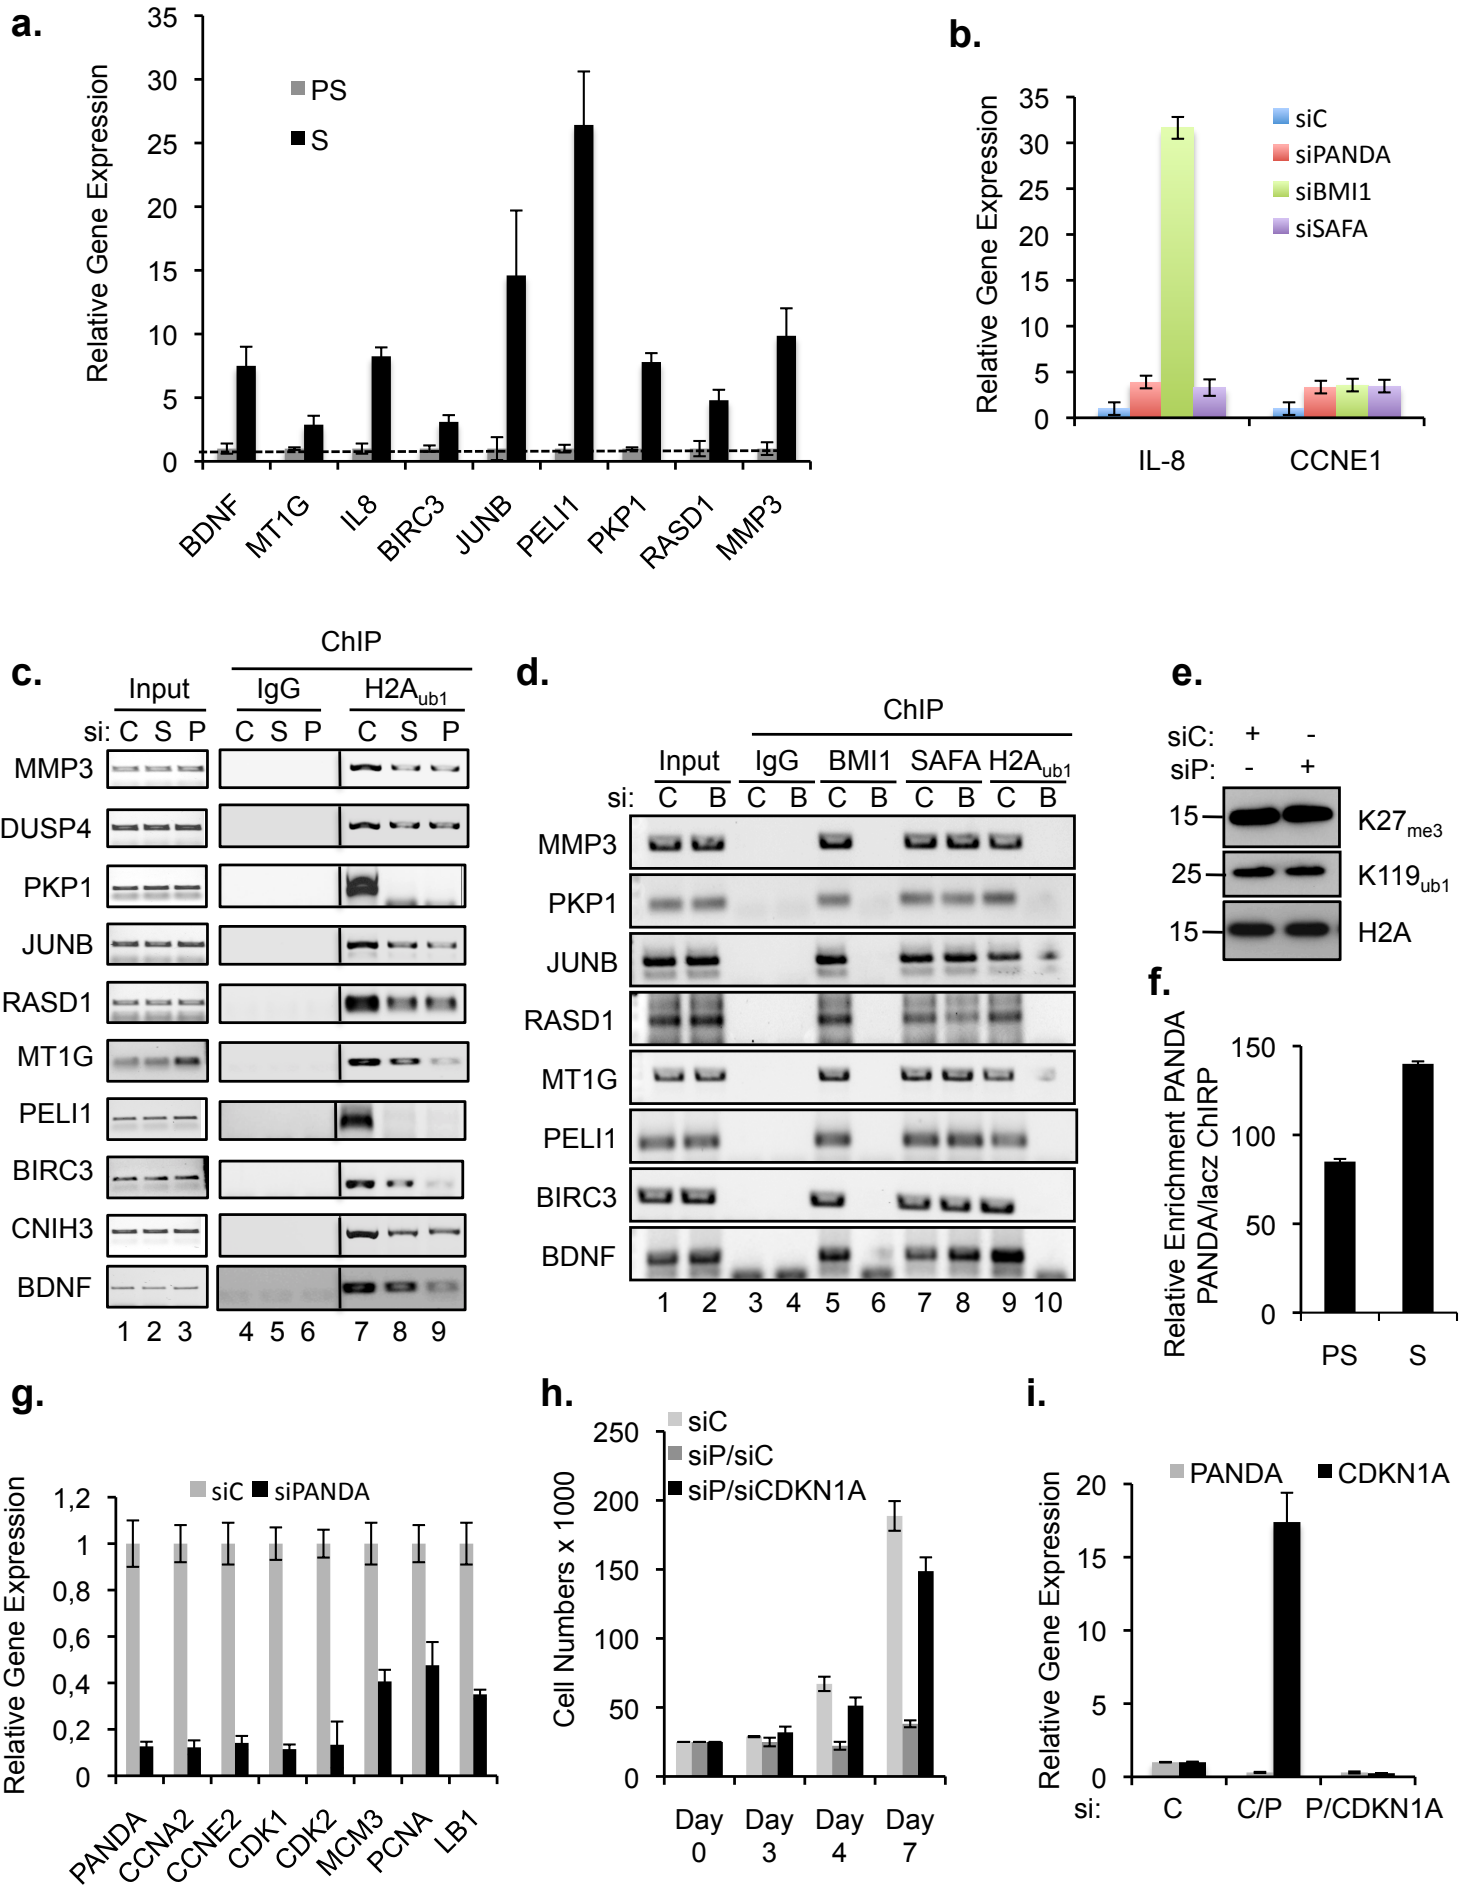

**Supplementary Figure 6. PANDA regulates PRC target gene expression and senescence entry.** **a.** qRT-PCR analysis of indicated genes on total RNA prepared from presenescent proliferating (PS) and RAS senescent (S) BJ fibroblasts. Error bars represent the s.d. of three independent experiments;  $P \leq 0,05$ , *t*-test. **b.** Presenescent proliferating BJ fibroblasts were transiently transfected with indicated siRNA duplexes. qRT-PCR on total RNA prepared from respective samples at day 2 of siRNA treatment for indicated genes. Error bars represent the s.d. of three independent experiments;  $P \leq 0,05$ , *t*-test. **c.** IgG and H2A<sub>Ub1</sub> (H2AK119<sub>Ub1</sub>) ChIP-PCR of indicated gene promoter regions in siScramble control (siC), siSAFA (siS) and siPANDA (siP)-treated presenescent proliferating BJ fibroblasts. **d.** IgG, BMI1, SAFA and H2A<sub>Ub1</sub> (H2AK119<sub>Ub1</sub>) ChIP-PCR of indicated gene promoter regions in siScramble control (siC), and siBMI1 (siB)-treated presenescent proliferating BJ fibroblasts. Shown is a representative of three independent experiments ( $n = 3$ ). **e.** Presenescent proliferating BJ fibroblasts were treated with siScramble control (siC) or siPANDA (siP) for 3 days and whole cell lysates were analyzed by Western blot using antibodies to H3K27<sub>me3</sub>, H2AK119<sub>Ub1</sub> and H2A. **f.** qRT-PCR analysis for PANDA enrichment in ChIRP assay using biotinylated PANDA-specific antisense and lacZ control DNA probes in pre-senescent (PS) and RAS-senescent (S) BJ fibroblasts. Error bars represent the s.d. of three independent experiments ( $n = 3$ );  $P \leq 0,05$ , *t*-test. **g.** Presenescent proliferating BJ fibroblasts were transiently transfected with indicated siScramble control and siPANDA. qRT-PCR on total RNA prepared from respective samples at day 2 of siRNA treatment for indicated genes. Error bars represent the s.d. of three independent experiments ( $n=3$ );  $P \leq 0,05$ , *t*-test. **h-i.** CDKN1A depletion rescues siPANDA-induced senescence. **h.** Presenescent proliferating BJ fibroblasts were transiently transfected or co-transfected either with siScramble control (siC), siPANDA pool (siP)/siC or siP/siCDKN1A for a duration of 7 days. Relative cell numbers at day 0, 2, 4 and 7 post siRNA-treatment are depicted. Error bars represent the s.d. of three independent experiments;  $P \leq 0,05$ , *t*-test. **i.** Relative *PANDA* and *CDKN1A* gene expression in samples of H as determined by qRT-PCR analysis. Error bars represent the s.d. of three independent experiments;  $P \leq 0,05$ , *t*-test.

## Supplementary Figure 7

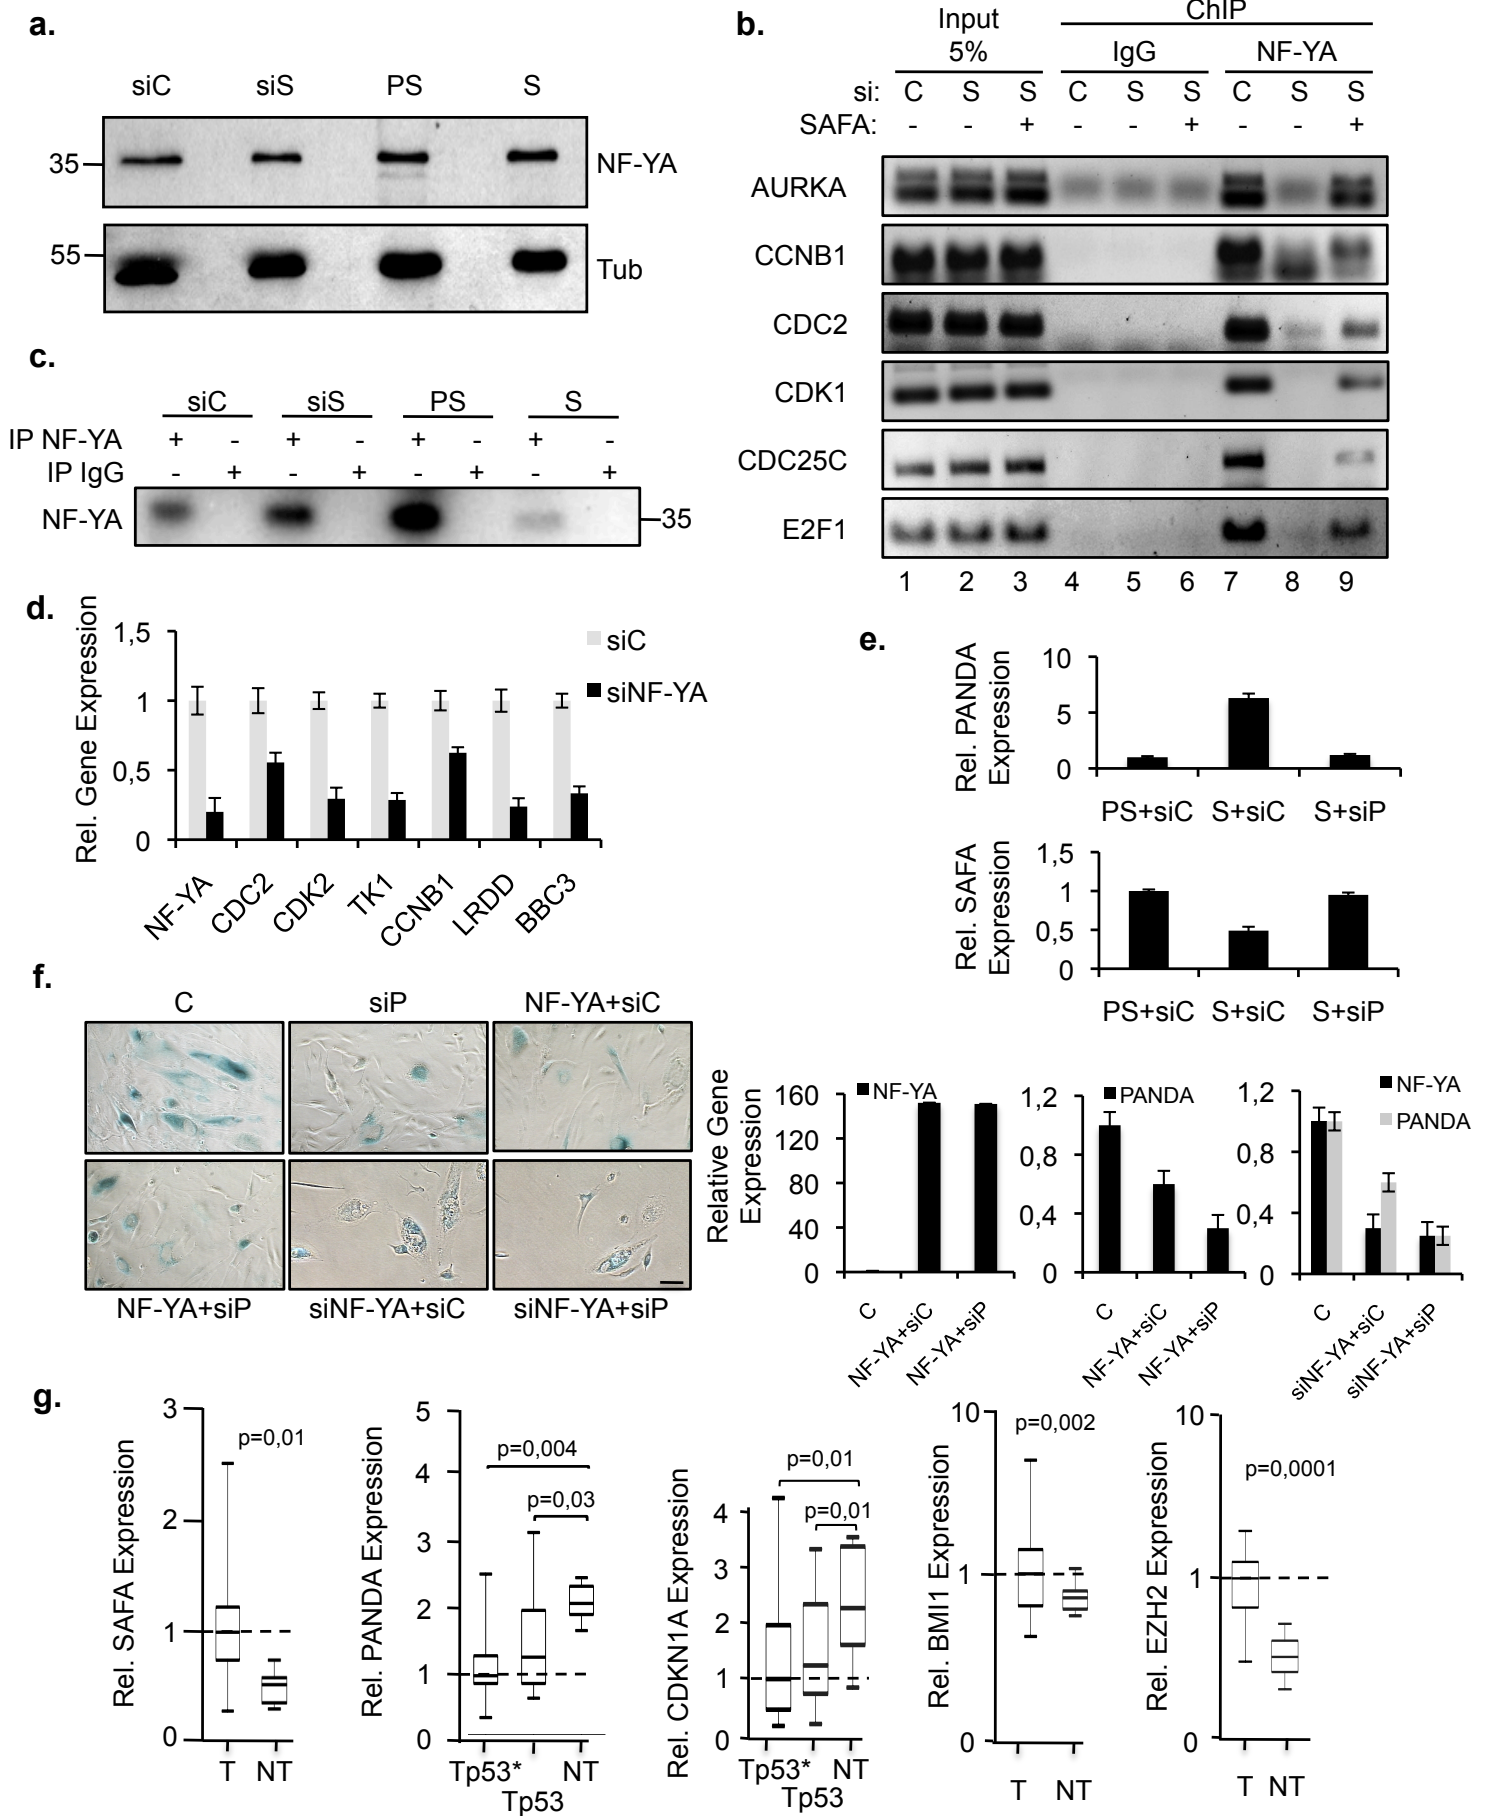

**Supplementary Figure 7. PANDA regulates NF-Y:E2F-coregulated expression of pro-proliferation genes and senescence exit.** **a.** Representative (n = 3) western blot analysis using antibodies to SAFA and Tubulin (Tub, loading control) of whole-cell-lysates prepared from siScramble control (siC) or siSAFA (siS)-treated presenescent proliferating BJ fibroblasts or presenescent proliferating (PS) and RAS senescent (S) BJ fibroblasts. **b.** IgG and NF-YA ChIP-PCR was performed in presenescent proliferating BJ fibroblasts treated for 3 days with siScramble control (siC) or siSAFA (siS) and overexpressing SAFA (+) or not (-). Shown is a representative of three independent experiments (n = 3). **c.** Immunoprecipitation (IP) of NF-YA in presenescent proliferating BJ fibroblasts treated with siScramble control (siC) or siSAFA (siS)- and presenescent proliferating (PS) or RAS senescent (S) BJ fibroblasts. Western blot with antibody to NF-YA. Shown is a representative of three independent experiments (n = 3). **d.** Presenescent proliferating BJ fibroblasts were treated with siScramble control (siC) or siNF-YA. qRT-PCR analysis for NF-YA target genes on total RNA prepared 3 days post treatment. Error bars represent the s.d. of three independent experiments;  $P \leq 0,05$ , *t*-test. **e.** Presenescent proliferating (PS) and RAS senescent (S) BJ fibroblasts were treated with siScramble control (siC) or siPANDA (siP) for 3 days. qRT-PCR was performed for PANDA (left panel) or SAFA (right panel) on total RNA prepared from respective samples. Error bars represent the s.d. of three independent experiments;  $P \leq 0,05$ , *t*-test. **f.** Representative photographs (scale bar 20  $\mu\text{m}$ ) of RAS senescent cells transfected with the indicated combinations. Note the decrease in SABG positive cells in NF-YA overexpressing (NF-YA) and siPANDA (siP) alone or together as well as diminished cell numbers indicative of ongoing cell death in siNF-YA treated cells. C is senescence cells treated either with siC or empty vector control. Also, shown are relative gene expression of NF-YA and PANDA compared to respective controls in these cell populations. **g.** SAFA, PANDA, CDKN1A, BMI1 and EZH2 expression levels in tumors (T)(n = 35) compared to non-tumors (NT)(n = 5). For PANDA and CDKN1A expression is also displayed for P53 mutant (\*) vs. P53 wildtype tumors. Human primary hepatocellular carcinomas (HCC) were derived from the fresh-frozen tissue bank of PP (see Supplementary Table S2 for details).

Supplementary Figure 8

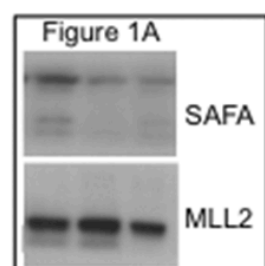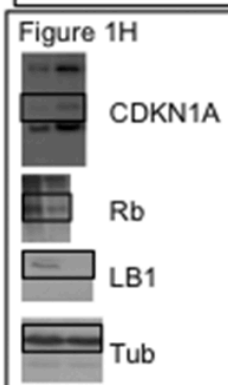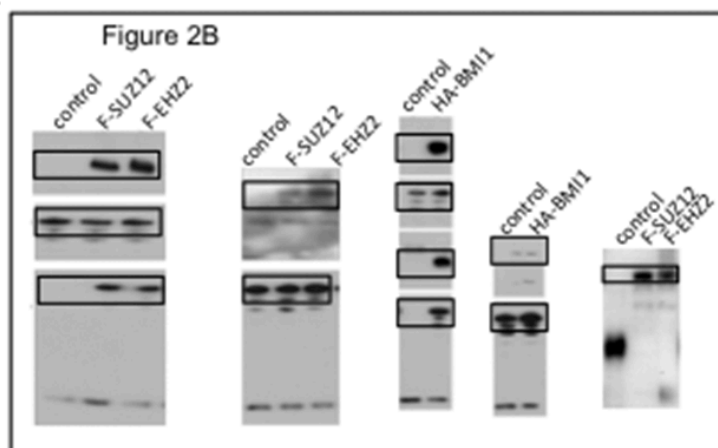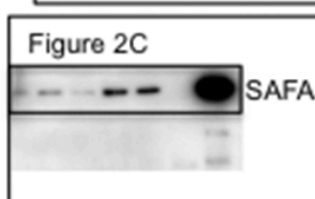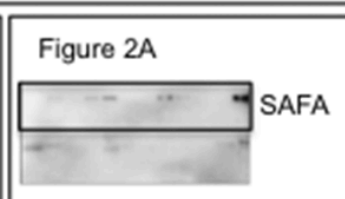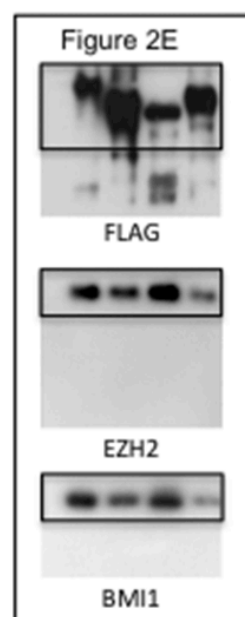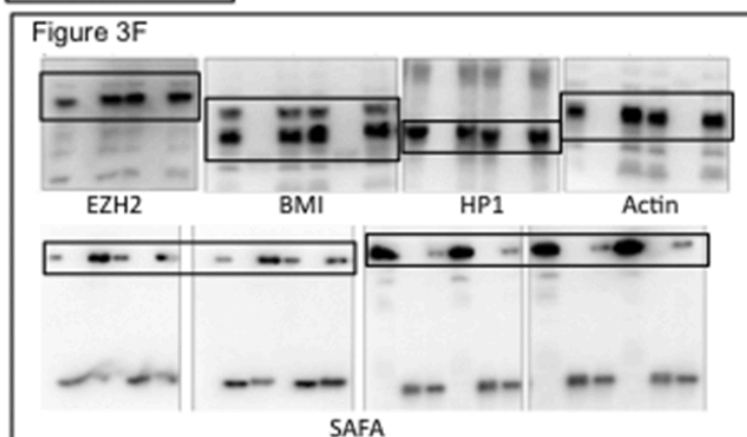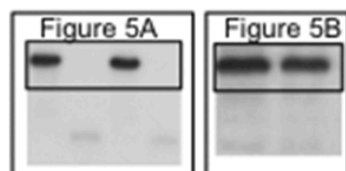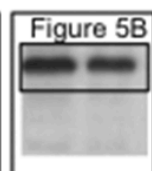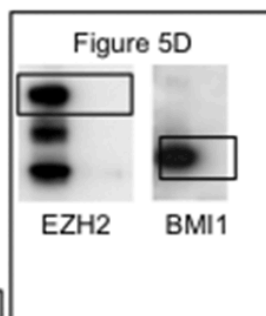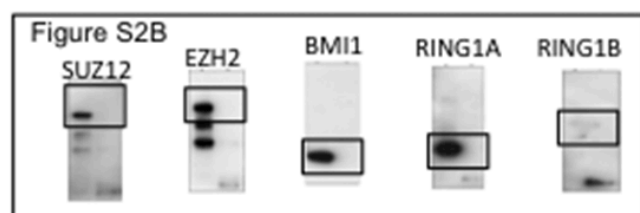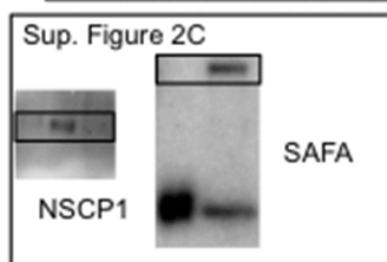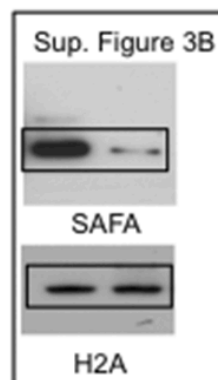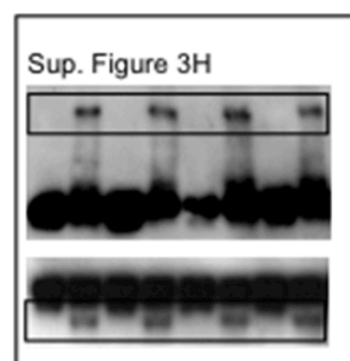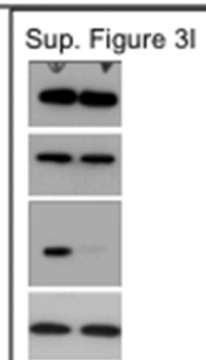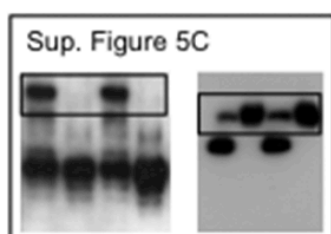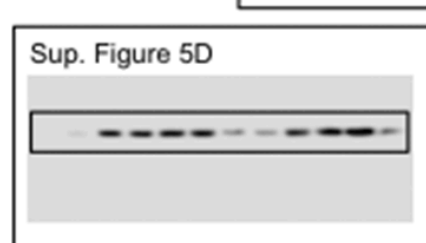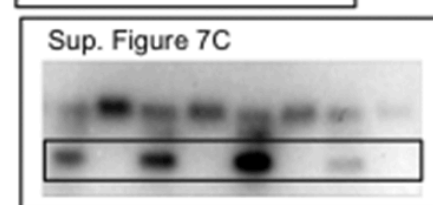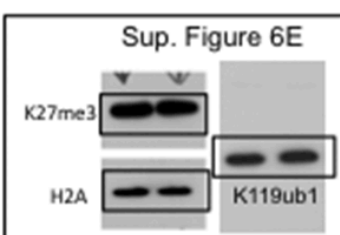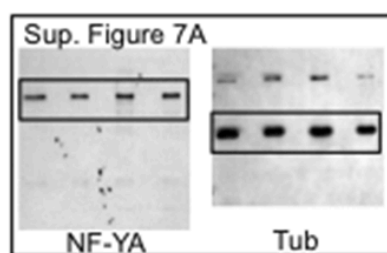

**Supplementary Figure 8.** Original scans of western blots.

### Supplementary Table 1:

Genotype of p53, sex and risk factor in hepatocellular carcinoma (HCC) patient cohort used for meta-analysis in Supplementary Figure 7g.

| <b>Sample ID</b>                                                                                                 | <b>Sex/<br/>Age</b> | <b>Risk<br/>Factor</b> | <b>p53<br/>genotype</b> |
|------------------------------------------------------------------------------------------------------------------|---------------------|------------------------|-------------------------|
| 28T                                                                                                              | M41                 | HBV                    | <i>R249S</i>            |
| 30T                                                                                                              | M47                 | HBV                    | <i>R110L</i>            |
| 31T                                                                                                              | M43                 | HBV                    | <i>V157F</i>            |
| 33T                                                                                                              | M22                 | HBV                    | <i>R249S</i>            |
| 35T                                                                                                              | M60                 | HBV                    | <i>D184N</i>            |
| 79T                                                                                                              | M49                 | HBV                    | <i>S121T</i>            |
| 81T                                                                                                              | M34                 | HBV                    | del a 872-fs-344*       |
| 83T                                                                                                              | M45                 | HBV                    | <i>Y326C</i>            |
| 87T                                                                                                              | M46                 | HBV                    | <i>R335C+S336L</i>      |
| 88T                                                                                                              | M68                 | HBV                    | <i>P152L</i>            |
| 90T                                                                                                              | M59                 | HBV-HCV                | <i>R309I</i>            |
| 92T                                                                                                              | M41                 | HBV                    | <i>R249S</i>            |
| 96T                                                                                                              | M30                 | HBV                    | <i>R249S</i>            |
| 97T                                                                                                              | M52                 | HBV                    | <i>R249S</i>            |
| 99T                                                                                                              | M60                 | HBV                    | <i>R267P</i>            |
| 102T                                                                                                             | M54                 | HBV                    | <i>R249S</i>            |
| 105T                                                                                                             | F40                 | HBV                    | <i>R249S</i>            |
| 134T                                                                                                             | F40                 | HBV                    | <i>Q104H</i>            |
| 185T                                                                                                             | M40                 | HBV                    | <i>R249S</i>            |
| 190T                                                                                                             | M37                 | HBV                    | <i>R249S</i>            |
| 192T                                                                                                             | M33                 | HBV                    | <i>E339*</i>            |
| 193T                                                                                                             | M66                 | HBV                    | <i>R110L</i>            |
| 2T                                                                                                               | F31                 | HBV                    | wt                      |
| 3T                                                                                                               | M26                 | HBV                    | wt                      |
| 27T                                                                                                              | M39                 | HBV                    | wt                      |
| 32T                                                                                                              | M50                 | HBV                    | wt                      |
| 34T                                                                                                              | M43                 | HBV                    | wt                      |
| 85T                                                                                                              | M48                 | HBV                    | wt                      |
| 94T                                                                                                              | M50                 | HBV                    | wt                      |
| 100T                                                                                                             | M51                 | HBV                    | wt                      |
| 186T                                                                                                             | F44                 | HBV                    | wt                      |
| 187T                                                                                                             | M66                 | HBV-HCV                | wt                      |
| 188T                                                                                                             | M63                 | HBV                    | wt                      |
| 191T                                                                                                             | M53                 | HBV                    | wt                      |
| 207T                                                                                                             | M40                 | cryptogenic            | wt                      |
| Clinico-Biological features of patients (n=35) and <i>TP53</i> genotypes of corresponding primary liver cancers. |                     |                        |                         |

## Supplementary Table 2

### qChIP-PCR primers used in this study:

DUSP4 FP: ATGGCTTACGATGGCACTG

DUSP4 RP: TTTAAGAAGGGCGCCGAAA

BMP2 FP: GGATCCCACGTCTATGCTATG

BMP2 RP: CAGGGTCTGGCCTCTTATTT

DLX2 FP: GTAATGCTCGCTTCTTAACCAATC

DLX2 RP: CCAGGGAAAGTGGTTTCAAATATAC

CNIH3 FP: CCAGGTGCTCTAAGATTCACTC

CNIH3 RP: GTCATCAAATCCAGAAAGCAAGG

P21 -511-645 FP: AGTGGACCTCAATTCCTCATC

P21 -511-645 RP: TATTCCCCTGATCCCTCACTA

P21 -4269-4381 FP: CGAGATGATGCCAACCAGAT

P21 -4269-4381 RP: CCCATTGCCTGTTCTCTCAA

MMP3 FP: GAGAGAAGAAGTAGGTTGACTTGG

MMP3 RP: AGCTATGTATGTACACTTTCCACTT

PKP1 FP: TGGTCTCTGCTATGACCTCAG

PKP1 RP: GGAGACCTCTCTCTAGGAAAGAAA

JUNB FP: CAATGGATTGTCAGTCCTCCTAC

JUNB RP: GGAGTCCACTGGGACAAATAC

RASD1 FP: CTGTCCCTCTGCGACTTC

RASD1 RP: ACTGGGTTACTTACTAGATTCCTATTC

MT1G FP: AGATGGGCCAAGTGCAAG

MT1G RP: GTGAGAGAAGCCGCACAC

PELI1 FP: CGGTCTTGTATTATGGTGTGTTG

PELI1 RP: TCAGACCTCACTGGGTACTIONTAT

BIRC3 FP: CCCTACATTTCTTTTACCTCTTAC

BIRC3 RP: GCTGCAGAAGTCCAGCATTTA

BDNF FP: TTCAGAAACCCTCACAGTCATC

BDNF RP: AGCATCTGCTGGCTAATTCA

WNT7B FP: CAACTCACACAACGCACATAA

WNT7B RP: GTGGTGTGTCTGTATGGTGT

AURKA FP: CTGCCTTGTGATTGGTTGAC



AURKA RP: CACCACTTCCGGGTTCTTA  
CCNB1 FP: GCCACGAACAGGCCAATAA  
CCNB1 RP: AGAAACCAACAGCCGTTCC  
CDK1 FP: CTCCGCTGACTAGAAACAGTAG  
CDK1 RP: GCGCGAAAGAAAGAGGAAAG  
CDC25C FP: GCCAGAGCAGGATAGTGTTT  
CDC25C RP: ACAGAAAGGGTGTGGAGATTG

**Semi-quantitative ChIP-PCR primers used in this study:**

DUSP4 FP: CGAGGGCACCGGTACCCGCCGGGTCTCTCC  
DUSP4 RP: GGACTAGGGTGAGCACAAGCCTTGAGCGC  
BMP2 FP: CCTCCTATTCCGGGGAAACAGAAGCGTGG  
BMP2 RP: GCCGCGGCCGAACACCTCCCCCTTCG  
DLX2 FP: GTAATGCTCGCTTCTTAACCAATCCGCAGGG  
DLX2 RP: TTGCAATGATAGGGTAGAACAGGGTCCTAAA  
CNIH3 FP: TGCAGGAATGTTGGGGCATAGTAGAAAG  
CNIH3 RP: GACAAGTCATCAAATCCAGAAAGCAAGGAAA  
P21 +37-342 FP: GCTCATTCTAACAGTGCTGTG  
P21 +37-342 RP: CAAGGAACTGACTTCGGCAG  
P21 -324-676 FP: CCCGGAAGCATGTGACAATC  
P21 -324-676 RP: CAGCACTGTTAGAATGAGCC  
P21 -677-981 FP: GGAGGCAAAAGTCCTGTGTTC  
P21 -677-981 RP: GGAAGGAGGGAATTGGAGAG  
P21 -964-1340 FP: CTGAGCAGCCTGAGATGTCAG  
P21 -964-1340 RP: CACAGGACTTTTGCCTCCTG  
P21 -1335-1688 FP: GAAATGCCTGAAAGCAGAGG  
P21 -1335-1688 RP: GCTCAGAGTCTGGAAATCTC  
P21 -2029-2478 FP: CACCACTGAGCCTTCCTCAC  
P21 -2029-2478 RP: CTGACTCCCAGCACACACTC  
P21 -3141-3558 FP: GACATAGCAGGTGTGATGACC  
P21 -3141-3558 RP: GTATTCAGGTGGCTGAGGTG  
P21 -4149-4525 FP: CGCGGTGCTTGGTCTCTATG  
P21 -4149-4525 RP: CCTTTCCCAACAAACAAGGGG  
MMP3 FP: GTAGGATGATACAACCTACTTTACTAATTTTC

MMP3 RP: GTATAGACTATAGCTATGTATGTACACTTTCCAC  
PKP1 FP: GGAGCAAGAGCTATGGTTCTGCCATCAGCC  
PKP1 RP: CAGGGAGACGCCCCTCTGTCCTGTTCTGC  
JUNB FP: CCAATGGATTGTCAGTCCTCCTACCCCTCTC  
JUNB RP: GGAAGCGCGTGTCTTGTAACAGCGGCCACG  
RASD1 FP: GAGCAGTCCAGGGTCGGGCTGAGGCTGGAGG  
RASD1 RP: GAGGACTGCAATATACGGTCCGCGCAAGCAC  
MT1G FP: GTGGAAGGCGGAGTGGAGCCCAACAGCCA  
MT1G RP: GAAGGCCTGGCAGGGTGAGAGAAGCCGCAC  
PELI1 FP: CTCCCACCGTTACCATGGTCACCGACACAC  
PELI RP: GTTTGTGGAAGATAAATTACGCAGCAGGGAAG  
BIRC3 FP: CACATACCCCTACATTTCTTTTACCTCTTAC  
BIRC3 RP: GATAACAACCCATATAGAGAGGACGATCATTG  
BDNF FP: AGGAGTAGTTCTAGATTTGCCAGGCTCC  
BDNF RP: TGGTATGTACCAGCTGTCCCAGTCTTAG  
WNT7B FP: ACACAGCACATACCAGAAATCACACAAACA  
WNT7B RP: GTGGTGTGGTATGGGTGCATGGTGTATG  
AURKA FP: CTTACTGGCAGTTCAAAGGTTAGT  
AURKA RP: GGAGTTAAACCCTCTAGCTAGAAAGC  
CCNB1 FP: CGATCGCCCTGGAAACGCATTC  
CCNB1 RP: CCCAGCAGAAACCAACAGCCGTTC  
CDC2 FP: AAACAGTAGGACGACAC  
CDC2 RP: CGCTCAATTTCCAAGAGCCAGCT  
CDK1 FP: GAACTGTGCCAATGCTGGGA  
CDK1 RP: GCAGTTTCAAACCTCACCGCG  
CDC25C FP: GAATGGACATCACTAGTAAGGCGCG  
CDC25C RP: GCAGGCGTTGACCATTCAAACCTTC  
E2F1 FP: GGCTACAGGTTGAGGGTCACG  
E2F1 RP: GAGCGCCGCCACAATTGGCT  
TK1 FP: AGACACATCCATCATGGCGTCTACA  
TK1 RP: GAAGTTCACGAACCCGAGTACTCT

### Supplementary Table 3

#### qRT-PCR primers:

DUSP4 FP: CCTGGCAGCCATCCCACCCCCGGTCCCC  
DUSP4 RP: GCTGATGCCAGGGCGTCCAGCATGTCTCTC  
WNT7B FP: CCAACATCATCTGCAACAAGATTCCTG  
WNT7B RP: CGAAGACGGTCTTCTCGCCGAGGGCAGAG  
CDKN1A FP: TCAGAGGAGGCGCCATGT  
CDKN1A RP: TGTCCACTGGGCCGAAGA  
BMP2 FP: GGAGCTGGGCCGCAGGAAGTTCGCGGC  
BMP2 RP: TGGTCTGGGGCGGGTGAGCCCGGCTGA  
DLX2 FP: CTCCAGCACGTACCACCAGCACCAGCAG  
DLX2 RP: CTGGTAGGAACCCATGTGCGCGATGGGCGAG  
CNIH3 FP: CCCCATAGACCAGTGCAATCCTGTTC  
CNIH3 RP: AGGGACATTCAGCCCCAGCGTGAGCCAC  
MMP3 FP: CCTGCTTTGTCCTTTGATGC  
MMP3 RP: TGAGTCAATCCCTGGAAAGTC  
PKP1 FP: CTCAGACAGCAAGGTTTCGATAG  
PKP1 RP: GTGAACTTTCCCAAATACTGCAC  
JUNB FP: ATGGAACAGCCCTTCTACCACG  
JUNB RP: AGGCTCGGTTTCAGGAGTTTG  
RASD1 FP: GAACTGCTATCGCATGGTCATCCTCGGCT  
RASD1 RP: GGAGTAGAACTTGCGGTGGAAGTCCTC  
MT1G FP: TTCCCTTCTCGCTTGGGAACTCTA  
MT1G RP: GCTCTTCTTGCAGGAGGTGCATTT  
PELI1 FP: TGTTCTCTGTGGCTTGGATGTGA  
PELI1 RP: TTGTTACCAGCCAACTGATGTGC  
BIRC3 FP: ATGAAGCCAGGTGTGGTGGTATGT  
BIRC3 RP: TCAGTATGCTGCCAGGATGGATT  
BDNF FP: ATTGGCTGGCGATTCATAAG  
BDNF RP: GTTCCCTTCTGGTCATGGA  
PANDA FP: TGCACACATTTAACCCGAAG  
PANDA RP: CCCCAAAGCTACATCTATGACA  
HPRT FP: GCTGGTGAAAAGGACCTCT

HPRT RP: CACAGGACTAGAACACCTGC

IL8-FP: GGCACAAACTTTCAGAGACAG

IL8-RP: ACACAGAGCTGCAGAAATCAGG

**siRNA SAFA:**

S102781002: CTGGCCGTGGTAGTACTCAA

S102780540: AGGATATTATTGAATACCCAA

## Supplementary Table 4

### Probes for chromatin-isolation by RNA purification

---

PANDA:

GAGGATGCCTCTCTTCAAAC  
ACAGGTGTCATAGATGTAGC  
CCAGGTTGGTAACACTGATG  
TCTGCTGCAAATCTCAGTTT  
GGAATTACCTTTGACAGTGG  
CCAACCAGATTTGCCGAAAT  
GGTGAAGCTCTATGGAAGTGG  
AGGTGGATCCCTGTAGAGAT  
TGAACATATCTGGACCACCT  
ACTAAAATACAAACATTGGG

---

LacZ:

TAAATGTGAGCGAGTAACAACC  
TGCCATAAAGAACTGTTACCC  
GAAGGATCGACAGATTTGATCC  
ATTTAATCAGCGACTGATCCAC  
GTCAGCAGTTGTTTTTATCGC
